# Supplementary material for: Platinum(ii) complexes bearing 1,1′-bis(diphenylphosphino)ferrocene as building blocks for functionalized redox active porphyrins
Source: Royal Society of Chemistry journal article supplement (doi:10.1039/b516391a), 2006-01-01
Supplement: b516391a.pdf [file b516391a.pdf]

# Platinum(II) Complexes Bearing 1,1'-bis(diphenylphosphino)ferrocene as Building Blocks for Functionalized Redox Active Porphyrins

*Luigi Monsù Scolaro,<sup>\*a</sup> Maria Rosaria Plutino,<sup>b</sup> Andrea Romeo,<sup>a</sup> Raffaello Romeo,<sup>a</sup>*

*Giampaolo Ricciardi,<sup>c</sup> Sandra Belviso,<sup>c</sup> Alberto Albinati,<sup>d</sup>*

## Electronic Supporting Information

**Fig. ESI1.**  $^{31}\text{P}\{^1\text{H}\}$  NMR spectra recorded in  $\text{CD}_2\text{Cl}_2$  at 298 K relative to the complexes  $[\text{PtMeCl}(\text{dppf})]$  (A),  $[\text{PtMe}(\text{Me}_2\text{SO})(\text{dppf})]\text{CF}_3\text{SO}_3$  (B), and  $[\text{PtMe}(\text{dppf})]_4\text{TpyP}(\text{CF}_3\text{SO}_3)_4$  (C).

**Fig. ESI2.** Absorption spectra of samples obtained by evaporating dichloromethane solutions of complexes **3** and **5** on glass cover slides.

**Fig. ESI3.** Fluorescence spectra of samples obtained by evaporating dichloromethane solutions of complexes **3** and **5** on glass cover slides.

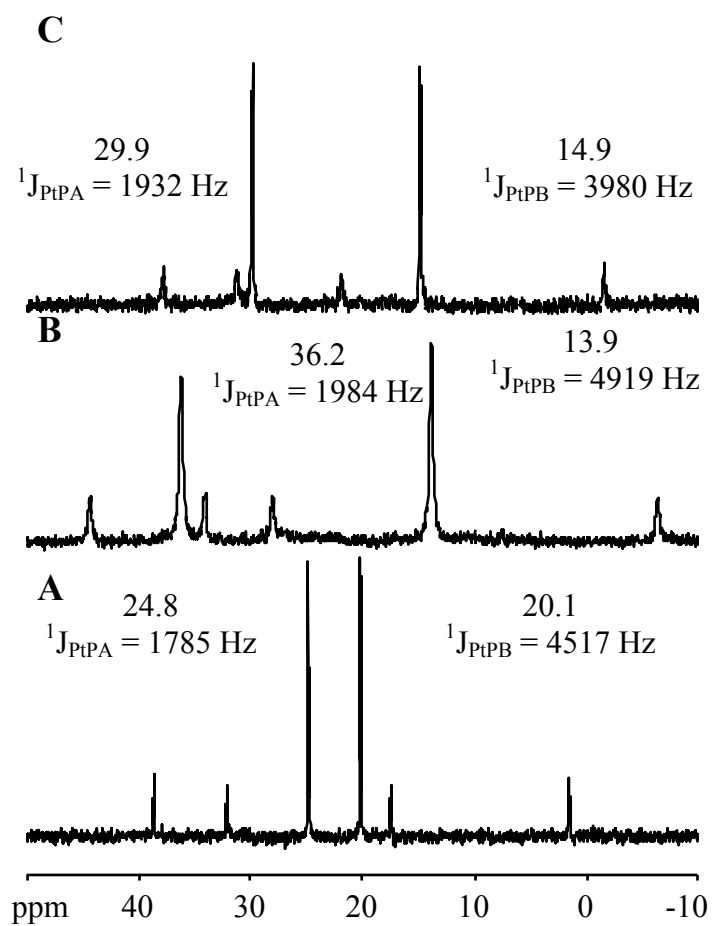

**Fig. ESI1**

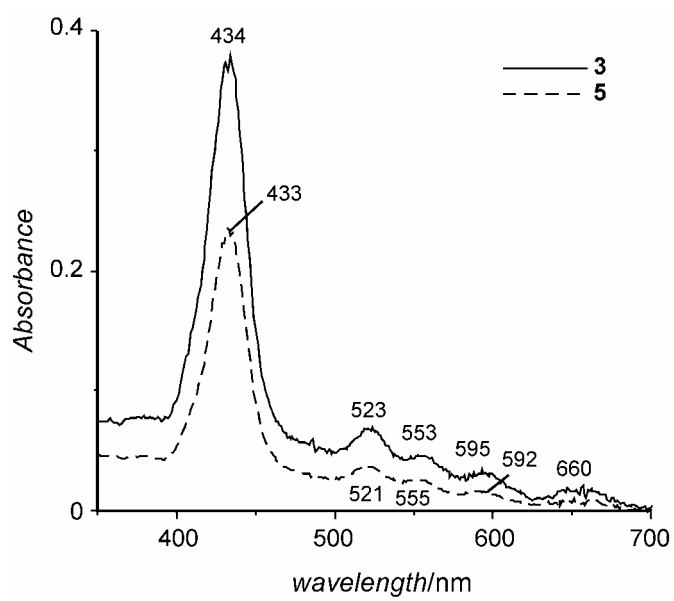

**Fig. ESI2**

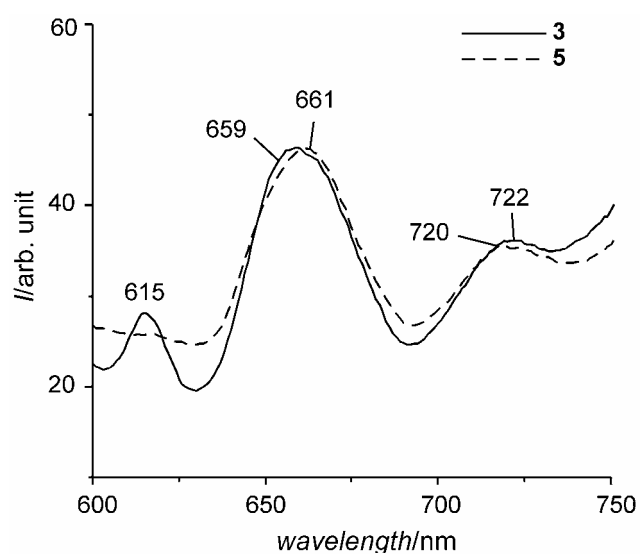

**Fig. ESI3**
